# Supplementary material
Source: PubMed Central journal article supplement (PMC8611691)
Supplement: NIHMS1717319-supplement-Supplemental_Material.pdf [file NIHMS1717319-supplement-Supplemental_Material.pdf]

## Tables

Table S1. Demographic characteristics by gender for wave 1 (N=139) and wave 2 (N=115).

|                                                          | Wave 1             |                    |                               | Wave 2             |                    |                               |
|----------------------------------------------------------|--------------------|--------------------|-------------------------------|--------------------|--------------------|-------------------------------|
|                                                          | Girls<br>(n = 73)  | Boys (n =<br>66)   |                               | Girls<br>(n = 62)  | Boys<br>(n = 53)   |                               |
| Age                                                      | 12.18<br>(SD=2.19) | 11.58<br>(SD=2.05) | $t(137) = 1.67,$<br>$p=.097$  | 12.74<br>(SD=2.11) | 12.64<br>(SD=2.15) | $t(113) =$<br>$0.25, p=.802$  |
| Diary days                                               | 19.16<br>(SD=2.25) | 18.98<br>(SD=2.02) | $t(137) = 0.49,$<br>$p=.623$  | 26.27<br>(SD=2.90) | 25.47<br>(SD=3.66) | $t(113) =$<br>$1.29, p=.201$  |
| Caucasian or white                                       | 50 (68.5%)         | 47 (71.2%)         | $\chi^2(6)=3.13,$<br>$p=.793$ | 41<br>(66.1%)      | 40<br>(75.5%)      | $\chi^2(6)=1.62,$<br>$p=.951$ |
| American Indian,<br>Native American, or<br>Alaska native | 2 (2.7%)           | 0 (0%)             |                               | 0 (0%)             | 0 (0%)             |                               |
| Asian or Asian<br>American                               | 4 (5.5%)           | 6 (9.1%)           |                               | 7 (11.3%)          | 4 (7.5%)           |                               |
| Black, African<br>American, or African                   | 5 (6.8%)           | 5 (7.6%)           |                               | 7 (11.3%)          | 4 (7.5%)           |                               |
| Latino or Hispanic                                       | 5 (6.8%)           | 4 (6.1%)           |                               | 4 (6.5%)           | 2 (3.8%)           |                               |
| Middle Eastern or<br>Arab                                | 3 (4.1%)           | 2 (3.0%)           |                               | 2 (3.2%)           | 2 (3.8%)           |                               |
| Mixed/Other                                              | 4 (5.5%)           | 2 (3.0%)           |                               | 1 (1.6%)           | 1 (1.9%)           |                               |

Table S2. Day level positive spillover within and outside the family and moderation by data wave: Full analyses

|                                                      |                                                  | Estimate<br>(SE) | t             | df          | p                | Moderation by wave |             |             |
|------------------------------------------------------|--------------------------------------------------|------------------|---------------|-------------|------------------|--------------------|-------------|-------------|
|                                                      |                                                  |                  |               |             |                  | t                  | df          | p           |
| (a) Outcome:<br>positive<br>interactions<br>mother   | Intercept                                        | -.02(.02)        | -0.917        | 4790        | .359             | -0.521             | 4790        | .603        |
|                                                      | Previous day positive<br>interactions mother     | .14(.02)         | 5.709         | 4790        | < .001           | -1.198             | 4790        | .231        |
|                                                      | <b>Same day positive<br/>interactions father</b> | <b>.46(.04)</b>  | <b>12.380</b> | <b>4790</b> | <b>&lt; .001</b> | <b>2.369</b>       | <b>4790</b> | <b>.018</b> |
|                                                      | Mean positive<br>interactions mother             | .97(.01)         | 76.845        | 4790        | < .001           | 2.009              | 4790        | .045        |
|                                                      | Mean positive<br>interactions father             | .03(.01)         | 2.309         | 4790        | .021             | -1.680             | 4790        | .093        |
| (b) Outcome:<br>positive<br>interactions<br>siblings | Intercept                                        | -0.01(.02)       | -0.516        | 4790        | .606             | -0.805             | 4790        | .421        |
|                                                      | Previous day positive<br>interactions siblings   | 0.16(.03)        | 5.766         | 4790        | < .001           | 0.864              | 4790        | .387        |
|                                                      | Same day positive<br>interactions father         | 0.28(.03)        | 9.347         | 4790        | < .001           | 0.045              | 4790        | .964        |
|                                                      | Mean positive<br>interactions siblings           | 1.02(.01)        | 72.959        | 4790        | < .001           | -1.362             | 4790        | .173        |
|                                                      | Mean positive<br>interactions father             | -0.01(.01)       | -0.635        | 4790        | .525             | 1.270              | 4790        | .204        |
| (c) Outcome:<br>positive<br>interactions<br>friends  | Intercept                                        | 0.01(.03)        | 0.471         | 4790        | .638             | -0.938             | 4790        | .348        |
|                                                      | Previous day positive<br>interactions friends    | 0.25(.03)        | 9.313         | 4790        | < .001           | -2.816             | 4790        | .005        |
|                                                      | <b>Same day positive<br/>interactions father</b> | <b>0.19(.03)</b> | <b>5.747</b>  | <b>4790</b> | <b>&lt; .001</b> | <b>-3.406</b>      | <b>4790</b> | <b>.001</b> |

|                                                      |                                                |            |        |      | Moderation by wave |        |      |      |
|------------------------------------------------------|------------------------------------------------|------------|--------|------|--------------------|--------|------|------|
|                                                      |                                                | Estimate   | t      | df   | p                  | t      | df   | p    |
|                                                      |                                                | (SE)       |        |      |                    |        |      |      |
| (d) Outcome:<br>positive<br>interactions<br>father   | Mean positive<br>interactions friends          | 1.01(.01)  | 68.205 | 4790 | < .001             | -0.417 | 4790 | .676 |
|                                                      | Mean positive<br>interactions father           | 0(.01)     | -0.057 | 4790 | .955               | 0.353  | 4790 | .724 |
|                                                      | Intercept                                      | 0.01(.02)  | 0.388  | 4790 | .698               | -1.014 | 4790 | .311 |
|                                                      | Previous day positive<br>interactions father   | 0.14(.02)  | 6.418  | 4790 | < .001             | -0.884 | 4790 | .377 |
|                                                      | Same day positive<br>interactions mother       | 0.36(.03)  | 11.565 | 4790 | < .001             | 0.910  | 4790 | .363 |
|                                                      | Mean positive<br>interactions father           | 1.01(.01)  | 84.436 | 4790 | < .001             | -0.440 | 4790 | .660 |
|                                                      | Mean positive<br>interactions mother           | -0.01(.01) | -0.676 | 4790 | .499               | 0.928  | 4790 | .354 |
| (e) Outcome:<br>positive<br>interactions<br>siblings | Intercept                                      | 0.01(.02)  | 0.308  | 4790 | .758               | -1.243 | 4790 | .214 |
|                                                      | Previous day positive<br>interactions siblings | 0.16(.03)  | 5.636  | 4790 | < .001             | 1.273  | 4790 | .203 |
|                                                      | Same day positive<br>interactions mother       | 0.22(.02)  | 9.206  | 4790 | < .001             | -0.003 | 4790 | .997 |
|                                                      | Mean positive<br>interactions siblings         | 1.02(.01)  | 77.608 | 4790 | < .001             | -1.363 | 4790 | .173 |
|                                                      | Mean positive<br>interactions mother           | -0.01(.01) | -1.055 | 4790 | .291               | 1.395  | 4790 | .163 |
| (f) Outcome:<br>positive                             | Intercept                                      | 0.02(.03)  | 0.546  | 4790 | .585               | -1.008 | 4790 | .314 |
|                                                      | Previous day positive<br>interactions friends  | 0.26(.03)  | 9.592  | 4790 | < .001             | -3.214 | 4790 | .001 |

|                                                    |                                                  | Moderation by wave |              |             |                  |               |             |             |
|----------------------------------------------------|--------------------------------------------------|--------------------|--------------|-------------|------------------|---------------|-------------|-------------|
|                                                    |                                                  | Estimate<br>(SE)   | t            | df          | p                | t             | df          | p           |
| interactions<br>friends                            | <b>Same day positive<br/>interactions mother</b> | <b>0.15(.03)</b>   | <b>5.667</b> | <b>4790</b> | <b>&lt; .001</b> | <b>-2.244</b> | <b>4790</b> | <b>.025</b> |
|                                                    | Mean positive<br>interactions friends            | 1.01(.01)          | 71.937       | 4790        | < .001           | -0.504        | 4790        | .614        |
|                                                    | Mean positive<br>interactions mother             | 0(.01)             | -0.161       | 4790        | .872             | 0.584         | 4790        | .559        |
|                                                    | Intercept                                        | 0(.02)             | 0.159        | 4790        | .874             | -1.171        | 4790        | .242        |
|                                                    | Previous day positive<br>interactions father     | .19(.02)           | 7.613        | 4790        | < .001           | -2.358        | 4790        | .018        |
| (g) Outcome:<br>positive<br>interactions<br>father | Same day positive<br>interactions siblings       | .38(.04)           | 9.786        | 4790        | < .001           | -1.278        | 4790        | .201        |
|                                                    | Mean positive<br>interactions father             | .99(.01)           | 95.851       | 4790        | < .001           | 0.609         | 4790        | .543        |
|                                                    | Mean positive<br>interactions siblings           | .01(.01)           | 0.397        | 4790        | .692             | 0.593         | 4790        | .553        |
|                                                    | Intercept                                        | -.02(.02)          | -0.796       | 4790        | .426             | -0.699        | 4790        | .484        |
|                                                    | Previous day positive<br>interactions mother     | .17(.03)           | 6.456        | 4790        | < .001           | -0.492        | 4790        | .623        |
| (h) Outcome:<br>positive<br>interactions<br>mother | Same day positive<br>interactions siblings       | .38(.04)           | 9.270        | 4790        | < .001           | 0.694         | 4790        | .488        |
|                                                    | Mean positive<br>interactions mother             | .99(.01)           | 93.891       | 4790        | < .001           | 0.733         | 4790        | .464        |
|                                                    | Mean positive<br>interactions siblings           | .01(.01)           | 0.600        | 4790        | .549             | 0.286         | 4790        | .775        |
|                                                    | Intercept                                        | .01(.03)           | 0.503        | 4790        | .615             | -1.067        | 4790        | .286        |

|                                                     |                                                    | Moderation by wave |              |             |                  |               |             |             |
|-----------------------------------------------------|----------------------------------------------------|--------------------|--------------|-------------|------------------|---------------|-------------|-------------|
|                                                     |                                                    | Estimate<br>(SE)   | t            | df          | p                | t             | df          | p           |
| (i) Outcome:<br>positive<br>interactions<br>friends | Previous day positive<br>interactions friends      | .24(.03)           | 8.863        | 4790        | < .001           | -2.284        | 4790        | .022        |
|                                                     | <b>Same day positive<br/>interactions siblings</b> | <b>.23(.04)</b>    | <b>5.817</b> | <b>4790</b> | <b>&lt; .001</b> | <b>-3.091</b> | <b>4790</b> | <b>.002</b> |
|                                                     | Mean positive<br>interactions friends              | > .99(.01)         | 71.705       | 4790        | < .001           | 0.293         | 4790        | .770        |
|                                                     | Mean positive<br>interactions siblings             | .02(.02)           | 1.387        | 4790        | .166             | -0.396        | 4790        | .692        |
|                                                     | Intercept                                          | 0(.02)             | -0.037       | 4790        | .970             | -1.468        | 4790        | .142        |
| (j) Outcome:<br>positive<br>interactions<br>father  | Previous day positive<br>interactions father       | .19(.03)           | 6.729        | 4790        | < .001           | -0.632        | 4790        | .528        |
|                                                     | Same day positive<br>interactions friends          | .12(.02)           | 5.248        | 4790        | < .001           | -0.784        | 4790        | .433        |
|                                                     | Mean positive<br>interactions father               | .98(.01)           | 114.801      | 4790        | < .001           | 2.681         | 4790        | .007        |
|                                                     | Mean positive<br>interactions friends              | .01(.01)           | 1.347        | 4790        | .178             | -0.556        | 4790        | .578        |
|                                                     | Intercept                                          | -.03(.03)          | -1.058       | 4790        | .290             | -0.832        | 4790        | .405        |
| (k) Outcome:<br>positive<br>interactions<br>mother  | Previous day positive<br>interactions mother       | .17(.03)           | 6.041        | 4790        | < .001           | -0.075        | 4790        | .940        |
|                                                     | Same day positive<br>interactions friends          | .1(.02)            | 4.074        | 4790        | < .001           | 1.335         | 4790        | .182        |
|                                                     | Mean positive<br>interactions mother               | .99(.01)           | 111.285      | 4790        | < .001           | 1.993         | 4790        | .046        |
|                                                     | Mean positive<br>interactions friends              | .02(.01)           | 1.752        | 4790        | .080             | -1.038        | 4790        | .300        |
|                                                     | Intercept                                          |                    |              |             |                  |               |             |             |

|                                                      |                                                     |                  |        |      | Moderation by wave |        |      |      |
|------------------------------------------------------|-----------------------------------------------------|------------------|--------|------|--------------------|--------|------|------|
|                                                      |                                                     |                  |        |      | t                  | df     | p    |      |
|                                                      |                                                     | Estimate<br>(SE) | t      | df   | p                  |        |      |      |
| Intercept                                            |                                                     | -.02(.02)        | -0.764 | 4790 | .445               | -0.706 | 4790 | .480 |
| (l) Outcome:<br>positive<br>interactions<br>siblings | Previous day positive<br>interactions with siblings | .15(.03)         | 5.065  | 4790 | < .001             | 1.859  | 4790 | .063 |
|                                                      | Same day positive<br>interactions friends           | .13(.03)         | 5.094  | 4790 | < .001             | -0.951 | 4790 | .342 |
|                                                      | Mean positive<br>interactions siblings              | .98(.01)         | 85.002 | 4790 | < .001             | 1.345  | 4790 | .179 |
|                                                      | Mean positive<br>interactions friends               | .01(.01)         | 1.407  | 4790 | .159               | -0.719 | 4790 | .472 |

Table S3. Day level negative spillover within and outside the family and moderation by data wave: Full analyses

|                                                      |                                                | Estimate<br>(SE) | t      | df   | p      | Moderation by wave |      |       |
|------------------------------------------------------|------------------------------------------------|------------------|--------|------|--------|--------------------|------|-------|
|                                                      |                                                |                  |        |      |        | t                  | df   | p     |
| (a) Outcome:<br>negative<br>interactions<br>mother   | Intercept                                      | 0(.01)           | -0.376 | 4790 | .707   | -0.051             | 4790 | .959  |
|                                                      | Previous day negative<br>interactions mother   | 0.08(.03)        | 3.179  | 4790 | .001   | -0.620             | 4790 | .535  |
|                                                      | Same day negative<br>interactions father       | 0.4(.05)         | 8.669  | 4790 | < .001 | 1.642              | 4790 | .101  |
|                                                      | Mean negative<br>interactions mother           | 1.02(.02)        | 45.412 | 4790 | < .001 | -0.910             | 4790 | .363  |
|                                                      | Mean negative<br>interactions father           | -0.04(.03)       | -1.261 | 4790 | .207   | 1.347              | 4790 | .178  |
| (b) Outcome:<br>negative<br>interactions<br>siblings | Intercept                                      | .01(.01)         | 0.642  | 4790 | .521   | -1.934             | 4790 | .053† |
|                                                      | Previous day negative<br>interactions siblings | .12(.03)         | 4.237  | 4790 | < .001 | 0.687              | 4790 | .492  |
|                                                      | Same day negative<br>interactions father       | .28(.05)         | 5.358  | 4790 | < .001 | 0.433              | 4790 | .665  |
|                                                      | Mean negative<br>interactions siblings         | .98(.01)         | 96.108 | 4790 | < .001 | 1.583              | 4790 | .114  |
|                                                      | Mean negative<br>interactions father           | .01(.03)         | 0.306  | 4790 | .759   | 0.838              | 4790 | .402  |
| (c) Outcome:<br>negative<br>interactions<br>friends  | Intercept                                      | -0.01(.01)       | -1.136 | 4790 | .256   | 0.639              | 4790 | .523  |
|                                                      | Previous day negative<br>interactions friends  | 0.1(.03)         | 3.390  | 4790 | .001   | 0.156              | 4790 | .876  |
|                                                      | Same day negative<br>interactions father       | 0.01(.03)        | 0.237  | 4790 | .813   | 0.600              | 4790 | .549  |

|                                                      |                                                |           |        |      | Moderation by wave |        |      |       |
|------------------------------------------------------|------------------------------------------------|-----------|--------|------|--------------------|--------|------|-------|
|                                                      |                                                | Estimate  | t      | df   | p                  | t      | df   | p     |
|                                                      |                                                | (SE)      |        |      |                    |        |      |       |
| (d) Outcome:<br>negative<br>interactions<br>father   | Mean negative<br>interactions friends          | 1.01(.02) | 62.094 | 4790 | < .001             | -0.138 | 4790 | .890  |
|                                                      | Mean negative<br>interactions father           | 0.05(.03) | 1.630  | 4790 | .103               | -1.328 | 4790 | .184  |
|                                                      | Intercept                                      | 0(.01)    | 0.070  | 4790 | .944               | -0.386 | 4790 | .699  |
|                                                      | Previous day negative<br>interactions father   | 0(.03)    | -0.156 | 4790 | .876               | 2.881  | 4790 | .004  |
|                                                      | Same day negative<br>interactions mother       | 0.31(.04) | 8.256  | 4790 | < .001             | 0.486  | 4790 | .627  |
|                                                      | Mean negative<br>interactions father           | 1.02(.02) | 41.496 | 4790 | < .001             | -0.643 | 4790 | .520  |
| (e) Outcome:<br>negative<br>interactions<br>siblings | Mean negative<br>interactions mother           | 0.02(.02) | 1.206  | 4790 | .228               | -0.277 | 4790 | .781  |
|                                                      | Intercept                                      | 0(.02)    | 0.228  | 4790 | .819               | -1.721 | 4790 | .085† |
|                                                      | Previous day negative<br>interactions siblings | .12(.03)  | 4.060  | 4790 | < .001             | 0.673  | 4790 | .501  |
|                                                      | Same day negative<br>interactions mother       | .19(.04)  | 4.682  | 4790 | < .001             | 1.161  | 4790 | .245  |
|                                                      | Mean negative<br>interactions siblings         | .97(.01)  | 86.408 | 4790 | < .001             | 2.812  | 4790 | .005  |
|                                                      | Mean negative<br>interactions mother           | .03(.03)  | 1.156  | 4790 | .248               | -0.378 | 4790 | .706  |
| (f) Outcome:<br>negative                             | Intercept                                      | 0(.01)    | -0.296 | 4790 | .768               | 0.314  | 4790 | .754  |
|                                                      | Previous day negative<br>interactions friends  | 0.09(.03) | 3.248  | 4790 | .001               | 0.589  | 4790 | .556  |



|              |                       | Moderation by wave |        |      |        |        |      |       |
|--------------|-----------------------|--------------------|--------|------|--------|--------|------|-------|
|              |                       | Estimate           | t      | df   | p      | t      | df   | p     |
|              |                       | (SE)               |        |      |        |        |      |       |
| interactions | Same day negative     | 0.05(.02)          | 2.589  | 4790 | .010   | -1.681 | 4790 | .093† |
| friends      | interactions mother   |                    |        |      |        |        |      |       |
|              | Mean negative         | 1.02(.01)          | 70.912 | 4790 | < .001 | -0.969 | 4790 | .333  |
|              | interactions friends  |                    |        |      |        |        |      |       |
|              | Mean negative         | -0.01(.02)         | -0.491 | 4790 | .623   | 0.540  | 4790 | .589  |
|              | interactions mother   |                    |        |      |        |        |      |       |
| Intercept    |                       | -0.01(.01)         | -0.641 | 4790 | .522   | 0.175  | 4790 | .861  |
|              | Previous day negative | 0.01(.03)          | 0.435  | 4790 | .663   | 2.666  | 4790 | .008  |
|              | interactions father   |                    |        |      |        |        |      |       |
| (g) Outcome: | Same day negative     | 0.12(.02)          | 4.852  | 4790 | < .001 | 0.530  | 4790 | .596  |
| negative     | interactions siblings |                    |        |      |        |        |      |       |
| interactions | Mean negative         | 1.04(.03)          | 41.299 | 4790 | < .001 | -1.535 | 4790 | .125  |
| father       | interactions father   |                    |        |      |        |        |      |       |
|              | Mean negative         | 0.01(.01)          | 1.365  | 4790 | .172   | -0.444 | 4790 | .657  |
|              | interactions siblings |                    |        |      |        |        |      |       |
| Intercept    |                       | 0(.01)             | -0.283 | 4790 | .777   | -0.293 | 4790 | .770  |
|              | Previous day negative | .09(.03)           | 3.232  | 4790 | .001   | -0.349 | 4790 | .727  |
|              | interactions mother   |                    |        |      |        |        |      |       |
| (h) Outcome: | Same day negative     | .13(.02)           | 5.168  | 4790 | < .001 | 0.110  | 4790 | .912  |
| negative     | interactions siblings |                    |        |      |        |        |      |       |
| interactions | Mean negative         | .98(.02)           | 42.478 | 4790 | < .001 | -0.334 | 4790 | .738  |
| mother       | interactions mother   |                    |        |      |        |        |      |       |
|              | Mean negative         | 0(.01)             | 0.436  | 4790 | .663   | 0.785  | 4790 | .432  |
|              | interactions siblings |                    |        |      |        |        |      |       |
| Intercept    |                       | -0.01(.01)         | -0.521 | 4790 | .602   | 0.200  | 4790 | .842  |

|                                                     |                                                   |                   |               |             |             | Moderation by wave |             |             |
|-----------------------------------------------------|---------------------------------------------------|-------------------|---------------|-------------|-------------|--------------------|-------------|-------------|
|                                                     |                                                   | Estimate          | t             | df          | p           | t                  | df          | p           |
|                                                     |                                                   | (SE)              |               |             |             |                    |             |             |
| (i) Outcome:<br>negative<br>interactions<br>friends | Previous day negative<br>interactions friends     | 0.09(.03)         | 3.295         | 4790        | .001        | 0.621              | 4790        | .534        |
|                                                     | Same day negative<br>interactions siblings        | 0.03(.02)         | 1.925         | 4790        | .054        | -0.948             | 4790        | .343        |
|                                                     | Mean negative<br>interactions friends             | 1.02(.01)         | 71.346        | 4790        | < .001      | -0.839             | 4790        | .401        |
|                                                     | Mean negative<br>interactions siblings            | -0.01(.01)        | -0.789        | 4790        | .430        | 1.265              | 4790        | .206        |
| Intercept                                           |                                                   | 0(.01)            | -0.118        | 4790        | .906        | -0.316             | 4790        | .752        |
| (j) Outcome:<br>negative<br>interactions<br>father  | Previous day negative<br>interactions father      | 0.02(.03)         | 0.774         | 4790        | .439        | 2.469              | 4790        | .014        |
|                                                     | <b>Same day negative<br/>interactions friends</b> | <b>-0.02(.02)</b> | <b>-0.842</b> | <b>4790</b> | <b>.400</b> | <b>2.395</b>       | <b>4790</b> | <b>.017</b> |
|                                                     | Mean negative<br>interactions father              | 1.06(.03)         | 38.944        | 4790        | < .001      | -1.355             | 4790        | .175        |
|                                                     | Mean negative<br>interactions friends             | -0.01(.02)        | -0.572        | 4790        | .568        | 0.127              | 4790        | .899        |
| Intercept                                           |                                                   | 0(.01)            | -0.233        | 4790        | .816        | -0.437             | 4790        | .662        |
| (k) Outcome:<br>negative<br>interactions<br>mother  | Previous day negative<br>interactions mother      | 0.11(.03)         | 3.929         | 4790        | < .001      | -0.490             | 4790        | .624        |
|                                                     | Same day negative<br>interactions friends         | 0.02(.02)         | 1.170         | 4790        | .242        | 0.570              | 4790        | .569        |
|                                                     | Mean negative<br>interactions mother              | 1(.02)            | 40.337        | 4790        | < .001      | -0.058             | 4790        | .954        |
|                                                     | Mean negative<br>interactions friends             | -0.01(.02)        | -0.619        | 4790        | .536        | 0.725              | 4790        | .468        |

|                                                      |                                                |                  |        |      | Moderation by wave |        |            |
|------------------------------------------------------|------------------------------------------------|------------------|--------|------|--------------------|--------|------------|
|                                                      |                                                |                  |        |      | t                  | df     | p          |
|                                                      |                                                | Estimate<br>(SE) | t      | df   | p                  |        |            |
| Intercept                                            |                                                | .01(.02)         | 0.604  | 4790 | .546               | -1.810 | 4790 .070† |
| (l) Outcome:<br>negative<br>interactions<br>siblings | Previous day negative<br>interactions siblings | .12(.03)         | 4.103  | 4790 | < .001             | 1.090  | 4790 .276  |
|                                                      | Same day negative<br>interactions friends      | .05(.03)         | 1.708  | 4790 | .088               | 0.108  | 4790 .914  |
|                                                      | Mean negative<br>interactions siblings         | .98(.01)         | 86.312 | 4790 | < .001             | 2.100  | 4790 .036  |
|                                                      | Mean negative<br>interactions friends          | -.01(.02)        | -0.649 | 4790 | .517               | 0.446  | 4790 .656  |

Table S4. Zero-order correlations between all study variables (N=112).

|    | Age <sup>1</sup> | 1. Depression T1 | 2. Depression T2 | Positive interactions T1 |           |            |           | Negative interactions T1 |           |            |            | Positive interactions T2 |            |             |            | Negative interactions T2 |            |             |            |
|----|------------------|------------------|------------------|--------------------------|-----------|------------|-----------|--------------------------|-----------|------------|------------|--------------------------|------------|-------------|------------|--------------------------|------------|-------------|------------|
|    |                  |                  |                  | 3. mother                | 4. father | 5. Sibling | 6. Friend | 7. mother                | 8. father | 9. Sibling | 10. Friend | 11. mother               | 12. father | 13. Sibling | 14. Friend | 15. mother               | 16. father | 17. Sibling | 18. Friend |
| 1  | .21*             |                  |                  |                          |           |            |           |                          |           |            |            |                          |            |             |            |                          |            |             |            |
| 2  | .12              | .72***           |                  |                          |           |            |           |                          |           |            |            |                          |            |             |            |                          |            |             |            |
| 3  | -.30**           | -.32***          | -.33***          |                          |           |            |           |                          |           |            |            |                          |            |             |            |                          |            |             |            |
| 4  | -.32***          | -.24***          | -.22*            | .80**                    |           |            |           |                          |           |            |            |                          |            |             |            |                          |            |             |            |
| 5  | -.21*            | -.17             | -.19*            | .68**                    | .75**     |            |           |                          |           |            |            |                          |            |             |            |                          |            |             |            |
| 6  | .05              | -.13             | -.10             | .24*                     | .30**     | .38**      |           |                          |           |            |            |                          |            |             |            |                          |            |             |            |
| 7  | .10              | .52***           | .34***           | -.20*                    | -.12      | -.15       | -.03      |                          |           |            |            |                          |            |             |            |                          |            |             |            |
| 8  | .02              | .42***           | .21*             | -.10                     | -.03      | -.08       | -.05      | .59***                   |           |            |            |                          |            |             |            |                          |            |             |            |
| 9  | -.15             | .32**            | .20*             | .13                      | .15       | -.01       | -.06      | .44***                   | .45***    |            |            |                          |            |             |            |                          |            |             |            |
| 10 | .13              | .49***           | .36***           | -.16                     | -.15      | -.17       | .13       | .51**                    | .50***    | .35***     |            |                          |            |             |            |                          |            |             |            |
| 11 | -.26**           | -.37***          | -.39***          | .68**                    | .57**     | .53***     | .26*      | -.14                     | -.09      | -.05       | -.20*      |                          |            |             |            |                          |            |             |            |
| 12 | -.32**           | -.26**           | -.32***          | .62**                    | .75**     | .61**      | .23*      | -.12                     | -.03      | .00        | -.16       | .81***                   |            |             |            |                          |            |             |            |
| 13 | -.20*            | -.20*            | -.27**           | .59**                    | .66**     | .71**      | .39***    | -.10                     | -.05      | .01        | -.15       | .71***                   | .80***     |             |            |                          |            |             |            |
| 14 | .30**            | -.04             | -.06             | .19*                     | .27*      | .28*       | .50***    | .01                      | -.02      | -.11       | .06        | .30***                   | .28**      | .42***      |            |                          |            |             |            |
| 15 | -.08             | .25**            | .31**            | -.03                     | -.05      | -.15       | -.06      | .50**                    | .20*      | .25*       | .44***     | -.08                     | -.07       | -.09        | -.02       |                          |            |             |            |
| 16 | -.10             | .05              | .25**            | .04                      | .09       | -.14       | .01       | .29*                     | .39**     | .19*       | .27*       | -.03                     | .05        | -.04        | .03        | .68**                    |            |             |            |
| 17 | -.17             | .11              | .19*             | .12                      | .15       | .03        | -.03      | .36***                   | .45***    | .55***     | .30*       | .09                      | .15        | .12         | -.08       | .455**                   | .643**     |             |            |
| 18 | .30**            | .22*             | .25**            | -.03                     | .04       | -.05       | .20*      | .18                      | .18       | .03        | .38***     | -.08                     | -.05       | -.07        | .34***     | .20*                     | .26**      | .16         |            |
|    |                  |                  |                  |                          |           |            |           |                          |           |            |            |                          |            |             |            |                          |            | 1           |            |

\* $p < .05$ , \*\* $p < .01$ , \*\*\* $p < .001$ <sup>1</sup>The correlation presented is between variable as measures as the same time as age
